# Supplementary material for: Double perovskite Cs2AgInCl6:Cr3+: broadband and near-infrared luminescent materials
Source: Royal Society of Chemistry journal article supplement (doi:10.1039/c9qi00905a), 2019-01-01
Supplement: c9qi00905a1.pdf [file c9qi00905a1.pdf]

## Supporting Information

# Double Perovskite Cs<sub>2</sub>AgInCl<sub>6</sub>:Cr<sup>3+</sup>: a Broadband and Near-infrared Luminescent Materials

Fangyi Zhao, Zhen Song, Jing Zhao\* and Quanlin Liu\*

The Beijing Municipal Key Laboratory of New Energy Materials and Technologies, School of Materials Sciences and Engineering, University of Science and Technology Beijing, Beijing 100083, China

### Corresponding Author

\* [jingzhao@ustb.edu.cn](mailto:jingzhao@ustb.edu.cn) (J. Zhao)

\* [qlliu@ustb.edu.cn](mailto:qlliu@ustb.edu.cn) (Q. L. Liu)

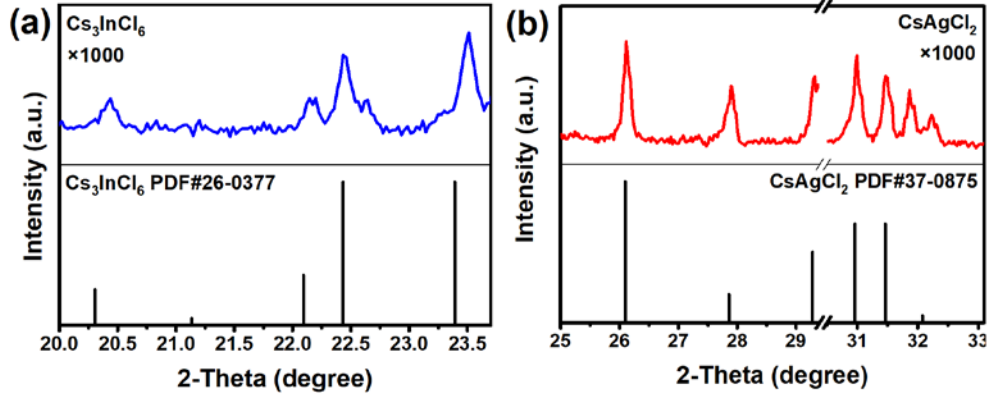

**Fig. S1** The magnified images of the impurity (a)  $\text{Cs}_3\text{InCl}_6$  and (b)  $\text{CsAgCl}_2$  phases together with their reference patterns.

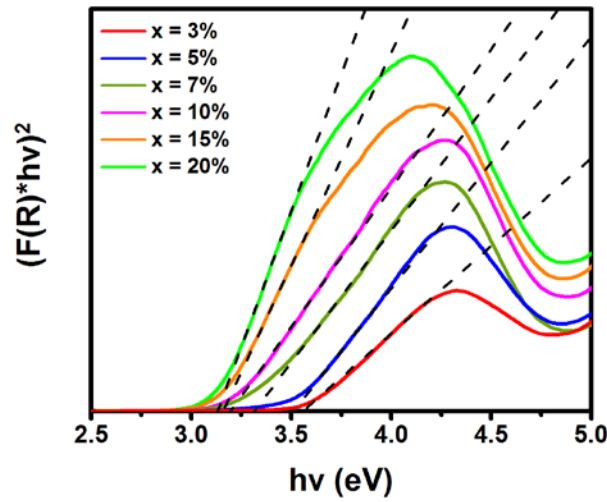

**Fig. S2** The diffuse reflection (DR) spectra of  $\text{Cs}_2\text{AgIn}_{1-x}\text{Cl}_6:x\text{Cr}^{3+}$  ( $x = 0.03, 0.05, 0.07, 0.1, 0.15$  and  $0.2$ ) with  $[F(R) \cdot hv]^2$  as a function of photon energy, for determining the band gap energy.

The optical band gap of  $\text{Cs}_2\text{AgInCl}_6$  host can be estimated according to eqn. S1,<sup>1</sup>

$$[F(R_\infty)hv]^n = A(hv - E_g) \quad (S1)$$

where  $hv$  is the photon energy;  $A$  is a proportional constant;  $E_g$  represents the value of the band gap;  $n = 2$  since the  $\text{Cs}_2\text{AgInCl}_6$  host absorption is a direct transition;<sup>2</sup> and  $F(R_\infty)$  is the Kubelka-Munk function defined as,<sup>1</sup>

$$F(R_\infty) = \frac{(1-R)^2}{2R} \quad (S2)$$

where  $R$  represents the reflection coefficient.

From the corresponding Tauc plot of  $[F(R_\infty)hv]^2$  versus  $hv$  (Fig. S2), we can get the optical band gap of all the samples.

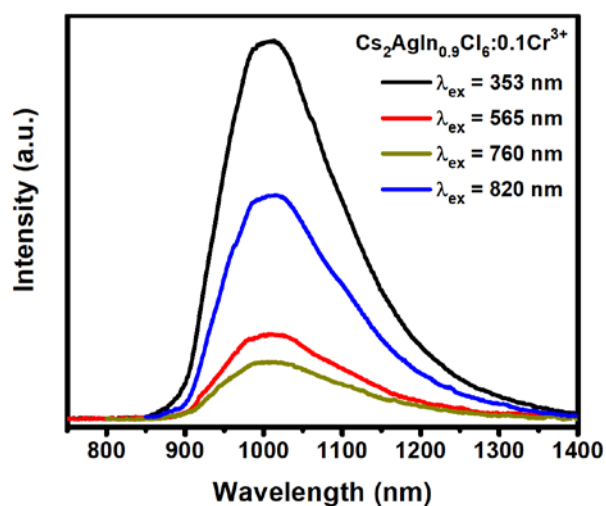

**Fig. S3** PL spectra of  $\text{Cs}_2\text{AgIn}_{0.9}\text{Cl}_6:0.1\text{Cr}^{3+}$  sample excited by 353, 565, 760 and 820 nm, respectively.

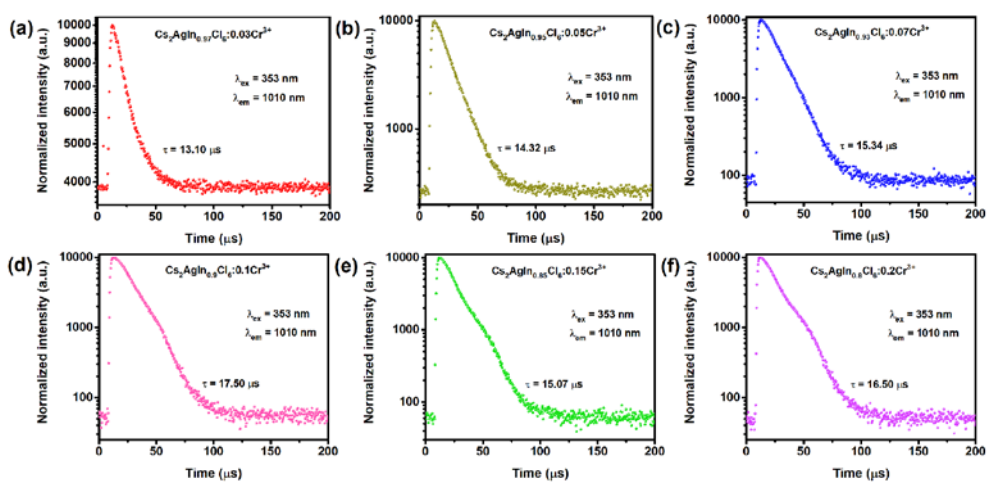

**Fig. S4** (a-f) The RT decay curves of  $\text{Cs}_2\text{AgIn}_{1-x}\text{Cl}_6:x\text{Cr}^{3+}$  ( $x = 0.03, 0.05, 0.07, 0.1, 0.15$  and  $0.2$ ) excited by 353 nm monitoring at 1010 nm.

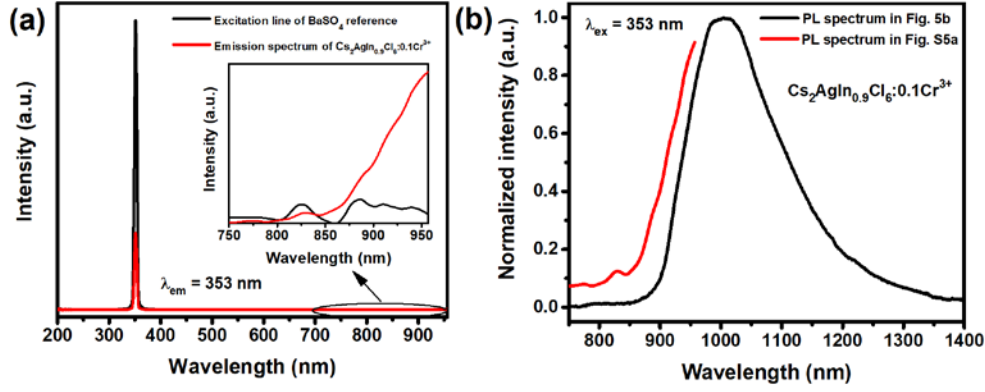

**Fig. S5** (a) Excitation lines of BaSO<sub>4</sub> and Cs<sub>2</sub>AgIn<sub>0.9</sub>Cl<sub>6</sub>:0.1Cr<sup>3+</sup>, and the emission spectrum of Cs<sub>2</sub>AgIn<sub>0.9</sub>Cl<sub>6</sub>:0.1Cr<sup>3+</sup> phosphor collected by using an integrating sphere. The inset shows the magnification of the emission spectrum of Cs<sub>2</sub>AgIn<sub>0.9</sub>Cl<sub>6</sub>:0.1Cr<sup>3+</sup>. (b) Normalized emission spectra of Cs<sub>2</sub>AgIn<sub>0.9</sub>Cl<sub>6</sub>:0.1Cr<sup>3+</sup> phosphor in Fig. 5b and Fig. S5a.

To determinate the PLQY values of the obtained Cs<sub>2</sub>AgIn<sub>0.9</sub>Cl<sub>6</sub>:0.1Cr<sup>3+</sup> phosphor, the emission spectra of the sample and the reference material BaSO<sub>4</sub> were recorded under different excitation light ranging from 196 to 957 nm. In order to describe the calculation method clearly, we use 353 nm excitation source as an example to calculate the PLQY value as shown in Fig. S5. Due to limitations of the instrument, we can obtain the number of emitted photons,  $N_{em}$ , through the proportion of steady-state emission spectrum in the room temperature (RT) as given in eqn. S3,

$$\frac{\int_{750}^{957} I_{Sample_{Fig.5b}} d\lambda}{\int_{750}^{1400} I_{Sample_{Fig.5b}} d\lambda} = \frac{\int_{750}^{957} I_{Sample_{Fig.S5a}} d\lambda}{N_{em}} \quad (S3)$$

In eqn. S3,  $\int_{750}^{957} I_{Sample_{Fig.5b}} d\lambda$ ,  $\int_{750}^{1400} I_{Sample_{Fig.5b}} d\lambda$  and  $\int_{750}^{957} I_{Sample_{Fig.S5a}} d\lambda$  represent the PL integrated intensities of Cs<sub>2</sub>AgIn<sub>0.9</sub>Cl<sub>6</sub>:0.1Cr<sup>3+</sup> phosphor at 750 to 957 nm, 750 to 1400 nm in Fig. 5b and 750 to 957 nm in Fig. S5a, respectively. And the values are 834266.5, 6231770 and 6181.13, respectively. Therefore, the number of emitted photons,  $N_{em}$ , is calculated to be 46171.55.

In addition, as shown in Fig. S5b, the shape of PL spectra in Fig. 5b and Fig. S5a are almost same demonstrating the accuracy of the calculation method according to eqn. S3.

By presuming a total reflection of the incident light which is equivalent to the PLQY value of the reference material BaSO<sub>4</sub>, the PLQY of the obtained Cs<sub>2</sub>AgIn<sub>0.9</sub>Cl<sub>6</sub>:0.1Cr<sup>3+</sup> phosphor can be derived from the following equation,<sup>3</sup>

$$PLQY = \frac{N_{em}}{N_{abs}} = \frac{N_{em}}{\int_{338}^{368} I_{BaSO_4} d\lambda - \int_{338}^{368} I_{Sample_{Fig.S5a}} d\lambda} \quad (S4)$$

In eqn. S4,  $\int_{338}^{368} I_{BaSO_4} d\lambda$  and  $\int_{338}^{368} I_{Sample_{Fig.S5a}} d\lambda$  represent the integrated intensities of BaSO<sub>4</sub> and Cs<sub>2</sub>AgIn<sub>0.9</sub>Cl<sub>6</sub>:0.1Cr<sup>3+</sup> phosphor at 338 to 368 nm in Fig. S5a. And the values are 511759.63 and 137806.87, respectively. Therefore, the PLQY of the obtained Cs<sub>2</sub>AgIn<sub>0.9</sub>Cl<sub>6</sub>:0.1Cr<sup>3+</sup> phosphor excited at 353 nm can be calculated to be 12.35%.

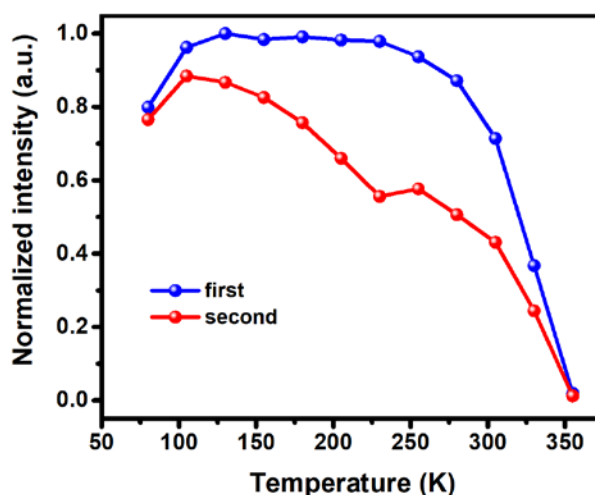

Fig. S6 The dependence of PL intensity of Cs<sub>2</sub>AgIn<sub>0.9</sub>Cl<sub>6</sub>:0.1Cr<sup>3+</sup> on heating temperature measured twice for the same sample.

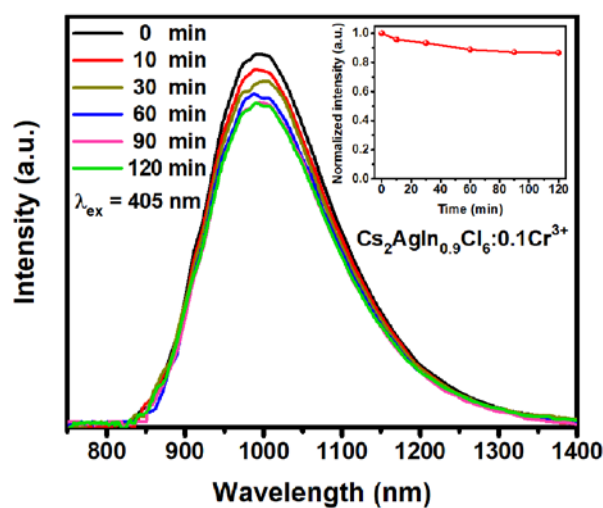

Fig. S7 PL spectra of Cs<sub>2</sub>AgIn<sub>0.9</sub>Cl<sub>6</sub>:0.1Cr<sup>3+</sup> exposed at 405 nm UV light for 0 minute, 10 minutes, 30 minutes, 60 minutes, 90 minutes and 120 minutes, and the inset shows the PL intensity dependence of irradiation time.

### References

- 1 J. Zhou, X. M. Rong, P. Zhang, M. S. Molokeev, P. J. Wei, Q. L. Liu, X. W. Zhang and Z. G. Xia, *Adv. Optical Mater.*, 2019, **7**, 1801435.
- 2 J. Zhou, Z. G. Xia, M. S. Molokeev, X. W. Zhang, D. S. Peng and Q. L. Liu, *J. Mater. Chem. A*, 2017, **5**, 15031-15037.
- 3 S. Möller, A. Katelnikovas, M. Haase, T. Jüstel, *J. Lumin.*, 2016, **172**, 185-190.
